# Supplementary material for: Chemical Composition, Larvicidal and Molluscicidal Activity of Essential Oils of Six Guava Cultivars Grown in Vietnam
Source: MDPI journal article supplement (doi:10.3390/plants12152888), 2023-08-07

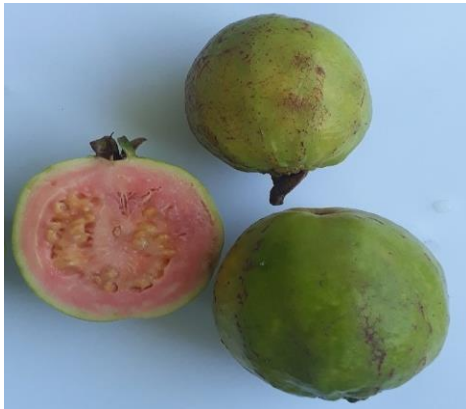

Fruit and leaves of cultivars Pink Pearl Guava (Code **PG01**)

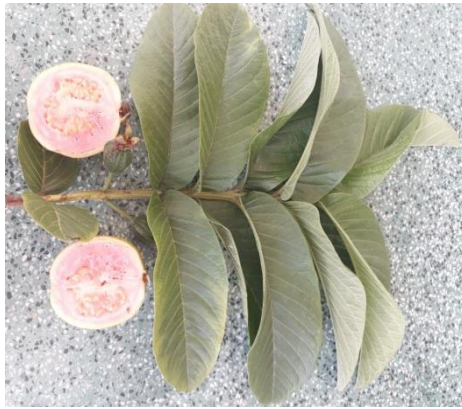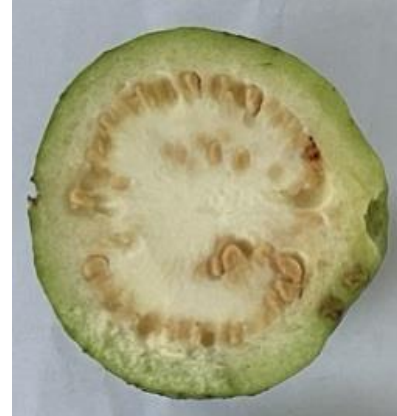

Fruit and leaves of cultivars White flesh Guava (Code **PG02**)

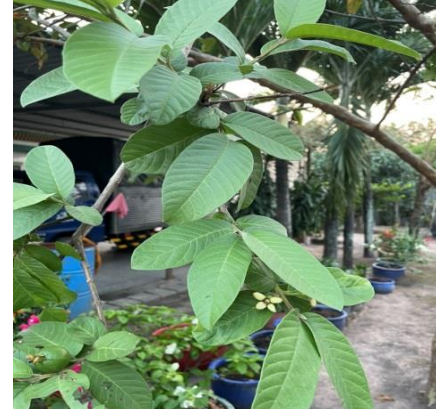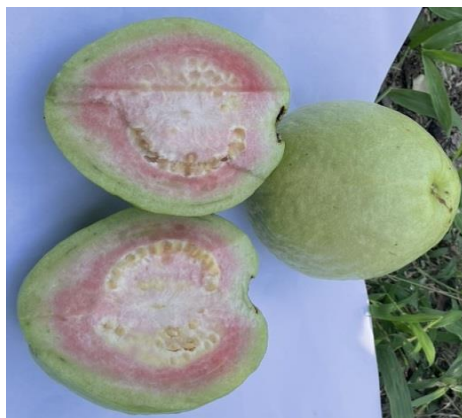

Fruit and leaves of cultivars Pink flesh smooth skin Guava (Code **PG03**)

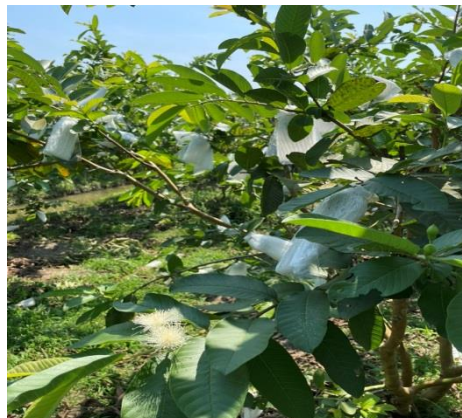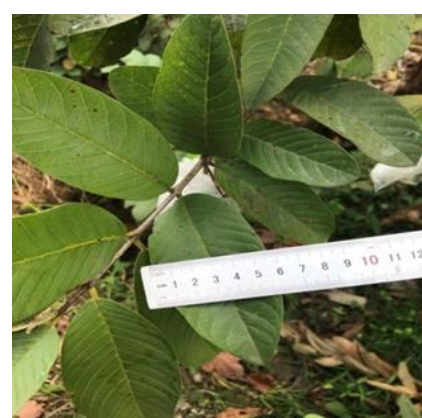

Leaves and fruit of cultivars Pink flesh rough skin Guava (Code **PG04**)

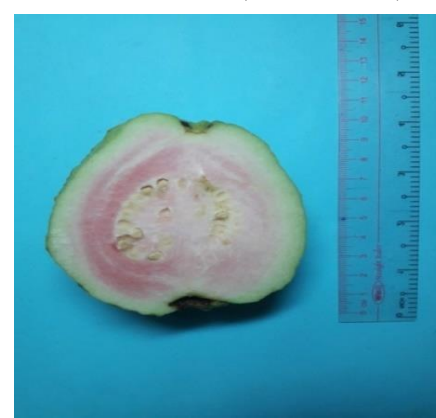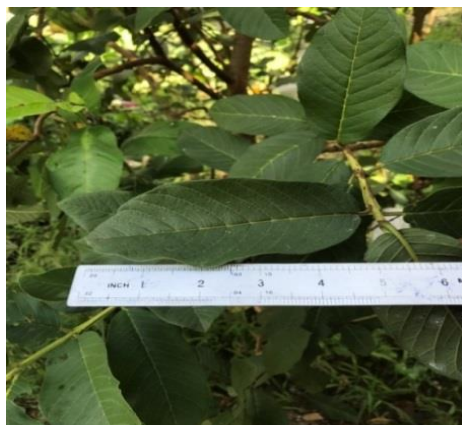

Leaves and fruit of cultivars Taiwan Guava (Code **PG05**)

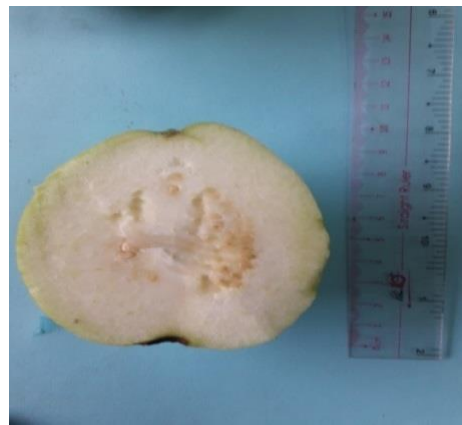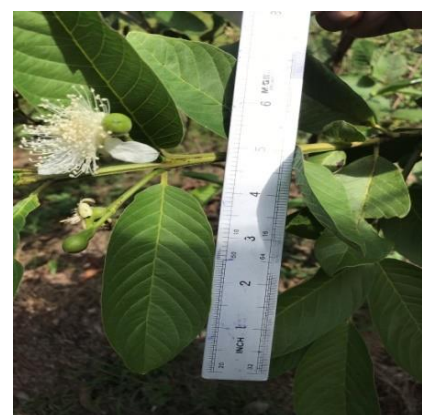

Leaves and fruit of cultivars Queen Guava (Code **PG06**)

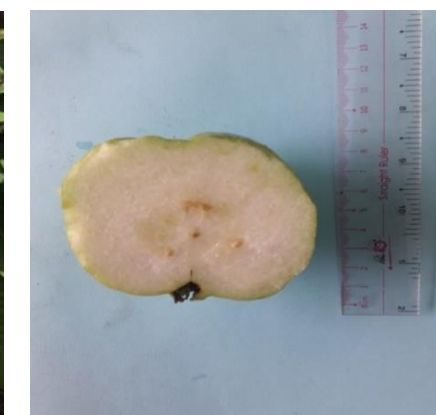

Supplement: s1 [file s1]
