# Supplementary material for: Chemical Composition, Larvicidal and Molluscicidal Activity of Essential Oils of Six Guava Cultivars Grown in Vietnam
Source: MDPI journal article supplement (doi:10.3390/plants12152888), 2023-08-07
Supplement: s1 [file s1]

Chemical composition of essential oils of six varieties of guava in Vietnam

| RI(calc) | RI(db) | Compound                                  | VL-41       | VL-42       | VL-43      | VL-44      | VL-45       | VL-46      |
|----------|--------|-------------------------------------------|-------------|-------------|------------|------------|-------------|------------|
| 920      | 919    | Hashishene                                | tr          | tr          | tr         | -          | -           | tr         |
| 925      | 925    | $\alpha$ -Thujene                         | tr          | tr          | tr         | -          | -           | tr         |
| 933      | 933    | <b><math>\alpha</math> Pinene</b>         | <b>13.0</b> | <b>0.5</b>  | <b>0.4</b> | <b>tr</b>  | <b>0.3</b>  | <b>0.1</b> |
| 947      | 948    | $\alpha$ -Fenchene                        | tr          | -           | tr         | -          | -           | -          |
| 949      | 950    | Camphene                                  | 0.1         | tr          | tr         | -          | -           | -          |
| 952      | 953    | Thuja-2,4(10)diene                        | tr          | -           | -          | -          | -           | -          |
| 960      | 960    | Benzaldehyde                              | tr          | tr          | tr         | -          | tr          | tr         |
| 977      | 978    | $\beta$ -Pinene                           | 0.2         | 0.1         | tr         | tr         | 0.1         | tr         |
| 988      | 989    | Myrcene                                   | 0.2         | 0.5         | 0.2        | tr         | 0.4         | 0.1        |
| 1004     | 1004   | <i>p</i> -Mentha-1(7),8-diene             | -           | 0.1         | -          | -          | tr          | -          |
| 1004     | 1005   | (3Z)-Hexenyl acetate                      | -           | -           | tr         | -          | -           | tr         |
| 1005     | 1006   | 3-Ethenyl-1,2-dimethylcyclohexa-1,4-diene | -           | tr          | -          | -          | -           | -          |
| 1006     | 1006   | $\alpha$ -Phellandrene                    | -           | tr          | tr         | -          | 0.1         | tr         |
| 1011     | 1012   | Hexyl acetate                             | -           | -           | tr         | -          | -           | tr         |
| 1016     | 1017   | $\alpha$ -Terpinene                       | -           | tr          | -          | -          | tr          | tr         |
| 1024     | 1024   | <i>p</i> -Cymene                          | 0.1         | 0.2         | 0.3        | tr         | 0.1         | tr         |
| 1029     | 1030   | <b>Limonene</b>                           | <b>0.7</b>  | <b>26.2</b> | <b>1.3</b> | <b>0.4</b> | <b>20.8</b> | <b>0.5</b> |
| 1030     | 1031   | $\beta$ -Phellandrene                     | tr          | 0.1         | 0.1        | tr         | 0.1         | tr         |
| 1031     | 1032   | 1,8-Cineole                               | 0.2         | 1.0         | 1.1        | tr         | 0.6         | 0.1        |
| 1034     | 1034   | (Z)- $\beta$ -Ocimene                     | 0.4         | 0.3         | 0.8        | 0.2        | 0.1         | 0.6        |
| 1045     | 1045   | (E)- $\beta$ -Ocimene                     | 0.1         | 0.1         | 0.2        | 0.1        | 0.1         | 0.2        |
| 1057     | 1057   | $\gamma$ -Terpinene                       | -           | 0.1         | tr         | tr         | 0.2         | tr         |
| 1063     | 1064   | Prenyl butyrate                           | tr          | -           | -          | -          | -           | -          |
| 1085     | 1086   | Terpinolene                               | tr          | tr          | tr         | tr         | tr          | tr         |
| 1090     | 1091   | Rosefuran                                 | tr          | tr          | tr         | -          | -           | -          |
| 1094     | 1097   | $\alpha$ -Pinene oxide                    | 0.1         | tr          | tr         | -          | -           | -          |
| 1099     | 1101   | Linalool                                  | -           | tr          | tr         | -          | tr          | tr         |
| 1102     | 1102   | 6-Methylhepta-3,5-dien-2-one              | 0.1         | -           | 0.1        | -          | -           | -          |
| 1104     | 1104   | Nonanal                                   | -           | -           | -          | -          | -           | tr         |
| 1126     | 1126   | $\alpha$ -Campholenal                     | tr          | -           | -          | -          | -           | -          |
| 1127     | 1127   | <i>allo</i> -Ocimene                      | tr          | tr          | tr         | tr         | -           | tr         |
| 1130     | 1130   | Limona ketone                             | tr          | tr          | tr         | -          | -           | -          |
| 1138     | 1141   | (E)-Myroxide                              | -           | -           | tr         | -          | -           | -          |
| 1140     | 1141   | <i>trans</i> -Pinocarveol                 | tr          | -           | -          | -          | -           | -          |
| 1145     | 1145   | <i>trans</i> -Verbenol                    | 0.1         | -           | -          | -          | -           | -          |
| 1162     | 1164   | Pinocarvone                               | tr          | -           | -          | -          | -           | -          |
| 1168     | 1168   | Rosefuran epoxide                         | tr          | -           | tr         | -          | -           | -          |
| 1180     | 1180   | Terpinen-4-ol                             | tr          | tr          | tr         | -          | tr          | tr         |
| 1184     | 1184   | <i>p</i> -Methylacetophenone              | tr          | -           | -          | -          | -           | -          |
| 1184     | 1187   | (3Z)-Hexenyl butyrate                     | -           | tr          | tr         | -          | -           | tr         |

|      |      |                                                                          |             |             |             |             |             |             |
|------|------|--------------------------------------------------------------------------|-------------|-------------|-------------|-------------|-------------|-------------|
| 1186 | 1186 | <i>p</i> -Cymen-8-ol                                                     | tr          | -           | -           | -           | -           | -           |
| 1186 | 1187 | Cryptone                                                                 | -           | -           | tr          | -           | -           | -           |
| 1187 | 1187 | <i>trans-p</i> -Mentha-1(7),8-dien-2-ol                                  | -           | tr          | -           | -           | -           | -           |
| 1194 | 1195 | $\alpha$ -Terpineol                                                      | 0.1         | 0.1         | 0.3         | -           | 0.1         | tr          |
| 1206 | 1205 | Verbenone                                                                | tr          | -           | -           | -           | -           | -           |
| 1207 | 1206 | Carveol                                                                  | -           | -           | -           | -           | -           | tr          |
| 1207 | 1207 | (3 <i>E</i> )-Octenyl acetate                                            | -           | -           | tr          | -           | -           | -           |
| 1217 | 1217 | <i>endo</i> -Fenchyl acetate                                             | tr          | -           | -           | -           | -           | -           |
| 1228 | 1228 | <i>cis-p</i> -Mentha-1(7),8-dien-2-ol                                    | -           | tr          | -           | -           | -           | -           |
| 1271 | 1276 | 2,3-Pinanediol                                                           | tr          | -           | -           | -           | -           | -           |
| 1283 | 1285 | Bornyl acetate                                                           | tr          | tr          | -           | -           | -           | -           |
| 1294 | 1294 | <i>trans</i> -Pinocarvyl acetate                                         | tr          | -           | -           | -           | -           | -           |
| 1297 | 1298 | Thujyl acetate                                                           | 0.1         | -           | -           | -           | -           | -           |
| 1345 | 1346 | $\alpha$ -Terpinyl acetate                                               | -           | -           | 0.1         | -           | -           | -           |
| 1346 | 1346 | $\alpha$ -Cubebene                                                       | -           | tr          | -           | tr          | -           | 0.1         |
| 1349 | 1346 | <i>trans</i> -Carvyl acetate                                             | -           | tr          | tr          | -           | -           | -           |
| 1357 | 1361 | Neryl acetate                                                            | -           | 0.1         | tr          | -           | 0.1         | -           |
| 1368 | 1367 | Cyclosativene                                                            | 0.1         | 0.1         | 0.1         | 0.1         | 0.1         | 0.2         |
| 1370 | 1370 | <i>iso</i> -Ledene                                                       | 0.1         | tr          | tr          | tr          | tr          | tr          |
| 1375 | 1375 | <b><math>\alpha</math>-Copaene</b>                                       | <b>2.4</b>  | <b>4.1</b>  | <b>2.7</b>  | <b>2.4</b>  | <b>4.2</b>  | <b>5.3</b>  |
| 1383 | 1382 | $\beta$ -Bourbonene                                                      | -           | -           | -           | tr          | -           | tr          |
| 1392 | 1391 | 1,1,4,7-Tetramethyl-1a,2,3,4,6,7,7a,7b-octahydro-1H-cyclopropa[e]azulene | 0.2         | tr          | tr          | 0.1         | tr          | 0.1         |
| 1403 | 1405 | ( <i>Z</i> )-Caryophyllene                                               | 0.2         | 0.1         | 0.2         | 0.1         | tr          | 0.1         |
| 1406 | 1406 | $\alpha$ -Gurjunene                                                      | 0.3         | 0.1         | 0.2         | 0.2         | 0.1         | 0.2         |
| 1410 | 1411 | $\beta$ -Maaliene                                                        | tr          | tr          | tr          | tr          | -           | tr          |
| 1413 | 1412 | Longifolene                                                              | 0.1         | tr          | tr          | 0.1         | tr          | 0.1         |
| 1415 | 1414 | $\alpha$ -Cedrene                                                        | -           | -           | tr          | -           | -           | -           |
| 1420 | 1417 | <b>(<i>E</i>)-<math>\beta</math>-Caryophyllene</b>                       | <b>13.9</b> | <b>20.4</b> | <b>21.7</b> | <b>30.0</b> | <b>24.8</b> | <b>27.8</b> |
| 1426 | 1430 | $\gamma$ -Maaliene                                                       | 0.3         | 0.1         | 0.1         | 0.2         | 0.1         | 0.1         |
| 1430 | 1431 | $\beta$ -Gurjunene (= Calarene)                                          | 0.6         | 0.1         | 0.2         | 0.3         | 0.1         | 0.1         |
| 1431 | 1430 | $\beta$ -Copaene                                                         | -           | -           | -           | -           | -           | 0.1         |
| 1432 | 1432 | <i>trans</i> - $\alpha$ -Bergamotene                                     | tr          | -           | tr          | tr          | -           | -           |
| 1433 | 1435 | $\alpha$ -Maaliene                                                       | 0.2         | tr          | 0.1         | 0.1         | tr          | 0.1         |
| 1439 | 1439 | <b>Aromadendrene</b>                                                     | <b>7.5</b>  | <b>2.9</b>  | <b>3.0</b>  | <b>5.9</b>  | <b>3.0</b>  | <b>3.5</b>  |
| 1445 | 1443 | Prenyl benzoate                                                          | -           | -           | -           | -           | -           | 0.1         |
| 1445 | 1446 | Myrtalyl-4(12)-ene                                                       | 0.7         | 0.2         | 0.2         | 0.4         | 0.1         | 0.2         |
| 1448 | 1447 | <i>iso</i> -Germacrene D                                                 | -           | tr          | tr          | tr          | tr          | -           |
| 1450 | 1451 | <i>trans</i> -Muurola-3,5-diene                                          | -           | -           | -           | -           | -           | tr          |
| 1451 | 1452 | ( <i>E</i> )- $\beta$ -Farnesene                                         | 0.2         | tr          | 0.2         | 0.1         | tr          | 0.1         |
| 1455 | 1454 | <b><math>\alpha</math>-Humulene</b>                                      | <b>2.7</b>  | <b>3.0</b>  | <b>4.0</b>  | <b>4.3</b>  | <b>3.6</b>  | <b>4.7</b>  |
| 1459 | 1458 | <i>allo</i> -Aromadendrene                                               | 1.5         | 1.2         | 1.2         | 1.3         | 1.2         | 1.4         |
| 1463 | 1463 | $\alpha$ -Acoradiene                                                     | tr          | -           | tr          | -           | -           | -           |

|      |      |                                                                               |             |            |             |             |            |            |
|------|------|-------------------------------------------------------------------------------|-------------|------------|-------------|-------------|------------|------------|
| 1471 | 1473 | <i>trans</i> -Cadina-1(6),4-diene                                             | -           | 0.2        | -           | 0.1         | 0.3        | 0.3        |
| 1474 | 1478 | $\gamma$ -Muurolene                                                           | 0.7         | 0.6        | 0.4         | 0.4         | 0.6        | 0.7        |
| 1476 | 1476 | $\gamma$ -Gurjunene                                                           | 0.1         | tr         | tr          | tr          | tr         | tr         |
| 1479 | 1482 | <i>ar</i> -Curcumene                                                          | 0.2         | -          | 0.2         | -           | -          | -          |
| 1486 | 1489 | $\delta$ -Selinene                                                            | 0.2         | 0.1        | 0.1         | 0.1         | 0.1        | 0.1        |
| 1488 | 1489 | $\beta$ -Selinene                                                             | 0.8         | 0.5        | 0.4         | 0.6         | 0.6        | 0.7        |
| 1490 | 1491 | Viridiflorene                                                                 | 0.5         | 0.2        | 0.2         | 0.4         | 0.3        | 0.4        |
| 1495 | 1497 | $\alpha$ -Selinene                                                            | 0.6         | 0.4        | 0.2         | 0.4         | 0.4        | 0.5        |
| 1497 | 1497 | $\alpha$ -Muurolene                                                           | 0.3         | 0.4        | 0.3         | 0.3         | 0.4        | 0.4        |
| 1499 | 1501 | ( <i>Z</i> )- $\alpha$ -Bisabolene                                            | 1.1         | 0.3        | 1.5         | 0.2         | 0.3        | 0.4        |
| 1502 | 1506 | $\delta$ -Amorphene                                                           | -           | 0.1        | -           | -           | 0.1        | -          |
| 1507 | 1508 | $\beta$ -Bisabolene                                                           | 2.4         | 0.3        | 2.7         | 0.3         | 0.3        | 0.4        |
| 1512 | 1512 | $\gamma$ -Cadinene                                                            | 0.4         | 0.3        | 0.4         | 0.3         | 0.3        | 0.3        |
| 1517 | 1518 | $\delta$ -Cadinene                                                            | 0.8         | 1.9        | 1.0         | 1.3         | 2.4        | 2.4        |
| 1520 | 1519 | <i>trans</i> -Calamenene                                                      | 0.2         | 1.6        | 1.4         | 1.0         | 1.8        | 2.3        |
| 1526 | 1528 | ( <i>E</i> )- $\gamma$ -Bisabolene                                            | -           | -          | tr          | 0.1         | tr         | 0.1        |
| 1532 | 1533 | <i>trans</i> -Cadina-1,4-diene                                                | -           | 1.4        | 0.1         | 0.5         | 1.8        | 1.3        |
| 1536 | 1538 | $\alpha$ -Cadinene                                                            | 0.1         | 0.1        | 0.1         | 0.1         | tr         | 0.1        |
| 1539 | 1540 | ( <i>E</i> )- $\alpha$ -Bisabolene                                            | 0.2         | -          | 0.2         | -           | tr         | tr         |
| 1540 | 1541 | $\alpha$ -Calacorene                                                          | 0.2         | 0.3        | 0.2         | 0.2         | 0.2        | 0.2        |
| 1550 | 1551 | ( <i>Z</i> )-Caryophyllene oxide                                              | 0.5         | -          | 0.5         | 0.2         | -          | 0.2        |
| 1554 | 1548 | Caryophyll-5-en-12-al                                                         | 0.2         | 0.7        | 0.2         | 0.3         | 0.2        | 0.1        |
| 1556 | 1555 | 2 <i>S</i> ,6 <i>S</i> -2,6,8,8-Tetramethyltricyclo[5.2.2.0(1,6)]undecan-2-ol | 0.1         | tr         | -           | -           | -          | -          |
| 1560 | 1560 | ( <i>E</i> )-Nerolidol                                                        | <b>1.4</b>  | <b>0.1</b> | <b>13.7</b> | <b>8.6</b>  | <b>tr</b>  | <b>7.8</b> |
| 1561 | 1560 | Germacrene B                                                                  | 3.3         | 1.2        | -           | 3.0         | 1.2        | -          |
| 1569 | 1568 | Maaliol                                                                       | 1.3         | 0.4        | 0.5         | 0.8         | 0.4        | 0.6        |
| 1571 | 1571 | (3 <i>Z</i> )-Hexenyl benzoate                                                | -           | -          | 0.2         | -           | -          | -          |
| 1572 | 1569 | Longipinocarvone                                                              | 0.1         | 0.2        | 0.1         | 0.1         | -          | 0.1        |
| 1573 | 1573 | Caryophyllene alcohol                                                         | 0.5         | 0.7        | 0.3         | -           | -          | -          |
| 1577 | 1576 | Spathulenol                                                                   | 0.1         | -          | 0.3         | 0.7         | 0.7        | 0.8        |
| 1583 | 1587 | <b>Caryophyllene oxide</b>                                                    | <b>8.1</b>  | <b>3.7</b> | <b>11.4</b> | <b>5.7</b>  | <b>2.4</b> | <b>5.3</b> |
| 1587 | 1590 | <b>Globulol</b>                                                               | <b>11.8</b> | <b>5.5</b> | <b>6.4</b>  | <b>10.9</b> | <b>5.9</b> | <b>6.0</b> |
| 1594 | 1594 | Viridiflorol                                                                  | 1.3         | 0.6        | 0.8         | 1.2         | 0.7        | 0.9        |
| 1596 | 1596 | Cubeban-11-ol                                                                 | 0.6         | 0.2        | 0.3         | 0.4         | 0.2        | 0.2        |
| 1598 | 1596 | Humulene epoxide I                                                            | 0.1         | 0.1        | 0.1         | 0.1         | tr         | 0.1        |
| 1604 | 1605 | Ledol                                                                         | 0.4         | 1.9        | 1.6         | 1.3         | 2.1        | 2.5        |
| 1606 | 1609 | Rosifoliol                                                                    | 1.5         | 0.4        | 0.6         | 0.8         | 0.5        | 0.4        |
| 1609 | 1611 | Humulene epoxide II                                                           | 1.0         | 0.7        | 1.3         | 0.7         | -          | -          |
| 1610 | 1613 | Copaborneol                                                                   | -           | -          | -           | -           | 1.1        | 1.5        |
| 1614 | 1614 | 1,10-di- <i>epi</i> -Cubenol                                                  | 0.1         | 0.1        | 0.1         | tr          | 0.2        | 0.2        |
| 1619 | 1620 | <i>epi</i> - $\gamma$ -Eudesmol                                               | 0.1         | 0.2        | 0.1         | 0.2         | 0.1        | 0.1        |

|      |      |                                                      |        |        |      |        |        |      |
|------|------|------------------------------------------------------|--------|--------|------|--------|--------|------|
| 1624 | 1627 | Eremoligenol                                         | 0.8    | 0.3    | 0.3  | 0.6    | 0.2    | 0.4  |
| 1625 | 1624 | Muurolo-4,10(14)-dien-1 $\beta$ -ol                  | 0.8    | 1.6    | 0.8  | 0.8    | -      | -    |
| 1626 | 1624 | <i>cis</i> -Calamenene                               | -      | 0.1    | -    | -      | 0.3    | 1.2  |
| 1627 | 1628 | 1- <i>epi</i> -Cubenol                               | 0.7    | 1.5    | 1.2  | 1.1    | 1.1    | 1.7  |
| 1633 | 1630 | Caryophylla-4(12),8(13)-dien-5 $\alpha$ -ol          | 0.5    | 0.8    | 0.7  | 0.9    | 1.8    | 1.2  |
| 1637 | 1636 | Caryophylla-4(12),8(13)-dien-5 $\beta$ -ol           | 1.7    | 2.6    | 2.0  | 2.7    | 0.8    | 2.5  |
| 1641 | 1640 | $\tau$ -Cadinol                                      | 0.9    | 1.7    | 1.9  | 1.3    | 1.7    | 1.1  |
| 1643 | 1644 | $\tau$ -Muurolol                                     | 0.7    | 0.6    | 0.6  | 0.5    | 0.7    | 1.7  |
| 1646 | 1651 | $\alpha$ -Muurolol (= $\delta$ -Cadinol)             | 2.1    | 1.9    | 1.5  | 1.6    | 1.8    | 2.5  |
| 1655 | 1655 | $\alpha$ -Cadinol                                    | 1.4    | 1.1    | 1.6  | 1.2    | 2.2    | 1.4  |
| 1658 | 1660 | <i>neo</i> -Intermedeol                              | 0.6    | 0.4    | 0.3  | 0.5    | 1.4    | 0.5  |
| 1664 | 1664 | <i>cis</i> -Calamenen-10-ol                          | 0.1    | -      | 0.1  | 0.1    | 0.2    | 0.2  |
| 1668 | 1669 | <i>epi</i> - $\beta$ -Bisabolol                      | 0.2    | -      | -    | -      | -      | -    |
| 1669 | 1671 | 14-Hydroxy-9- <i>epi</i> -( <i>E</i> )-caryophyllene | -      | 0.3    | -    | 0.4    | 0.6    | 0.9  |
| 1670 | 1671 | $\beta$ -Bisabolol                                   | 0.4    | -      | 0.7  | -      | -      | -    |
| 1672 | 1672 | Cadalene                                             | -      | 0.1    | -    | -      | 0.1    | -    |
| 1685 | 1686 | <i>epi</i> - $\alpha$ -Bisabolol                     | 0.1    | -      | 0.2  | tr     | -      | tr   |
| 1687 | 1688 | $\alpha$ -Bisabolol                                  | 0.4    | 0.1    | 0.6  | 0.1    | 0.1    | 0.1  |
| 1700 | 1700 | Heptadecane                                          | -      | tr     | -    | -      | -      | -    |
| 1700 | 1701 | 10- <i>nor</i> -Calamenen-10-one                     | tr     | -      | tr   | -      | -      | -    |
| 1713 | 1714 | (2 <i>E</i> ,6 <i>Z</i> )-Farnesol                   | -      | -      | -    | -      | -      | tr   |
| 1766 | 1769 | Benzyl benzoate                                      | -      | tr     | 0.1  | tr     | -      | tr   |
| 1804 | 1804 | 14-Hydroxy- $\delta$ -cadinene                       | tr     | -      | -    | -      | -      | -    |
| 1839 | 1841 | Phytone                                              | tr     | tr     | tr   | -      | -      | -    |
| 2109 | 2109 | Phytol                                               | 0.1    | tr     | 0.2  | 0.1    | -      | 0.4  |
| 2500 | 2500 | Pentacosane                                          | -      | -      | tr   | -      | -      | -    |
| 2700 | 2700 | Heptacosane                                          | -      | -      | tr   | -      | -      | -    |
|      |      | Monoterpene hydrocarbons                             | 14.7   | 28.0   | 3.3  | 0.8    | 22.3   | 1.4  |
|      |      | Oxygenated monoterpenoids                            | 0.5    | 1.2    | 1.5  | 0.0    | 0.8    | 0.1  |
|      |      | Sesquiterpene hydrocarbons                           | 42.7   | 42.2   | 43.3 | 54.9   | 49.0   | 56.2 |
|      |      | Oxygenated sesquiterpenoids                          | 40.7   | 28.3   | 50.7 | 43.6   | 27.1   | 41.2 |
|      |      | Diterpenoids                                         | 0.1    | traces | 0.2  | 0.1    | 0.0    | 0.4  |
|      |      | Benzenoid aromatics                                  | traces | traces | 0.3  | traces | traces | 0.1  |
|      |      | Others                                               | 0.1    | 0.0    | 0.1  | 0.0    | 0.0    | 0.0  |
|      |      | Total identified                                     | 98.8   | 99.7   | 99.3 | 99.4   | 99.2   | 99.4 |
